# Supplementary material
Source: PubMed Central journal article supplement (PMC5207135)
Supplement: 10.1074_M116.761015_jbc.M116.761015-1.pdf [file 10.1074_M116.761015_jbc.M116.761015-1.pdf]

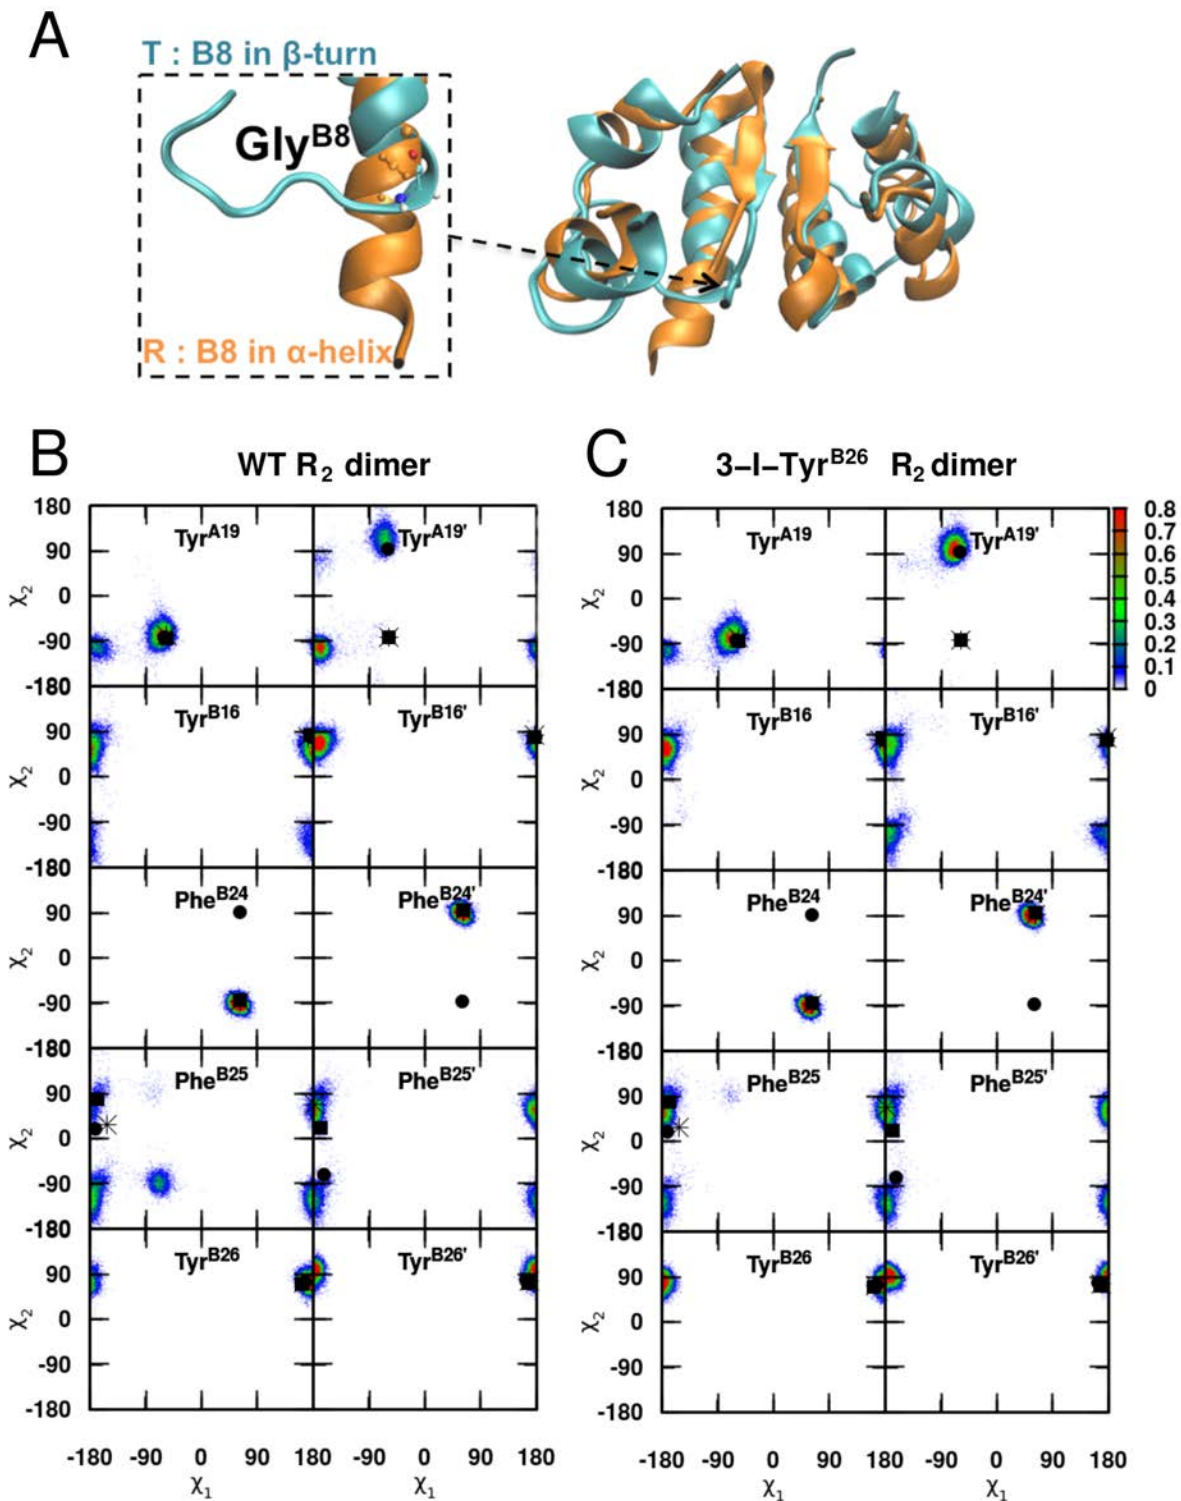

**FIGURE S1. Dihedral probability distribution functions for the  $R_2$  dimers.** (A) Structure of the R- ( $\alpha$ -helix B1-B8; gold) and T (disordered strand B1-B8; cyan) -states of insulin dimer. The inset indicates the placement of the invariant Gly<sup>B8</sup> as a function of T/R state. Only Gly<sup>B8</sup> is illustrated. (B and C) Probability distribution functions  $P(\chi_1, \chi_2)$  for Tyr<sup>A19</sup>, Tyr<sup>B16</sup>, Phe<sup>B24</sup>, Phe<sup>B25</sup>, Tyr<sup>B26</sup> and their dimer related mates (indicated by primes) for (B) the WT  $R_2$  insulin dimer, and (C) the 3-iodo-Tyr<sup>B26</sup>  $R_2$  insulin dimer. The distributions were built from 20 ns equilibrium MD simulations. The starting dimer structure was taken from a dimer of WT  $R_6$  zinc

insulin crystal structure (PDB code 1ZNJ). Symbols (*box*, *star*, *circle*) indicate positions in the X-ray crystal structure of the 3-I-Tyr<sup>B26</sup>-Nle<sup>B29</sup>-insulin hexamer.

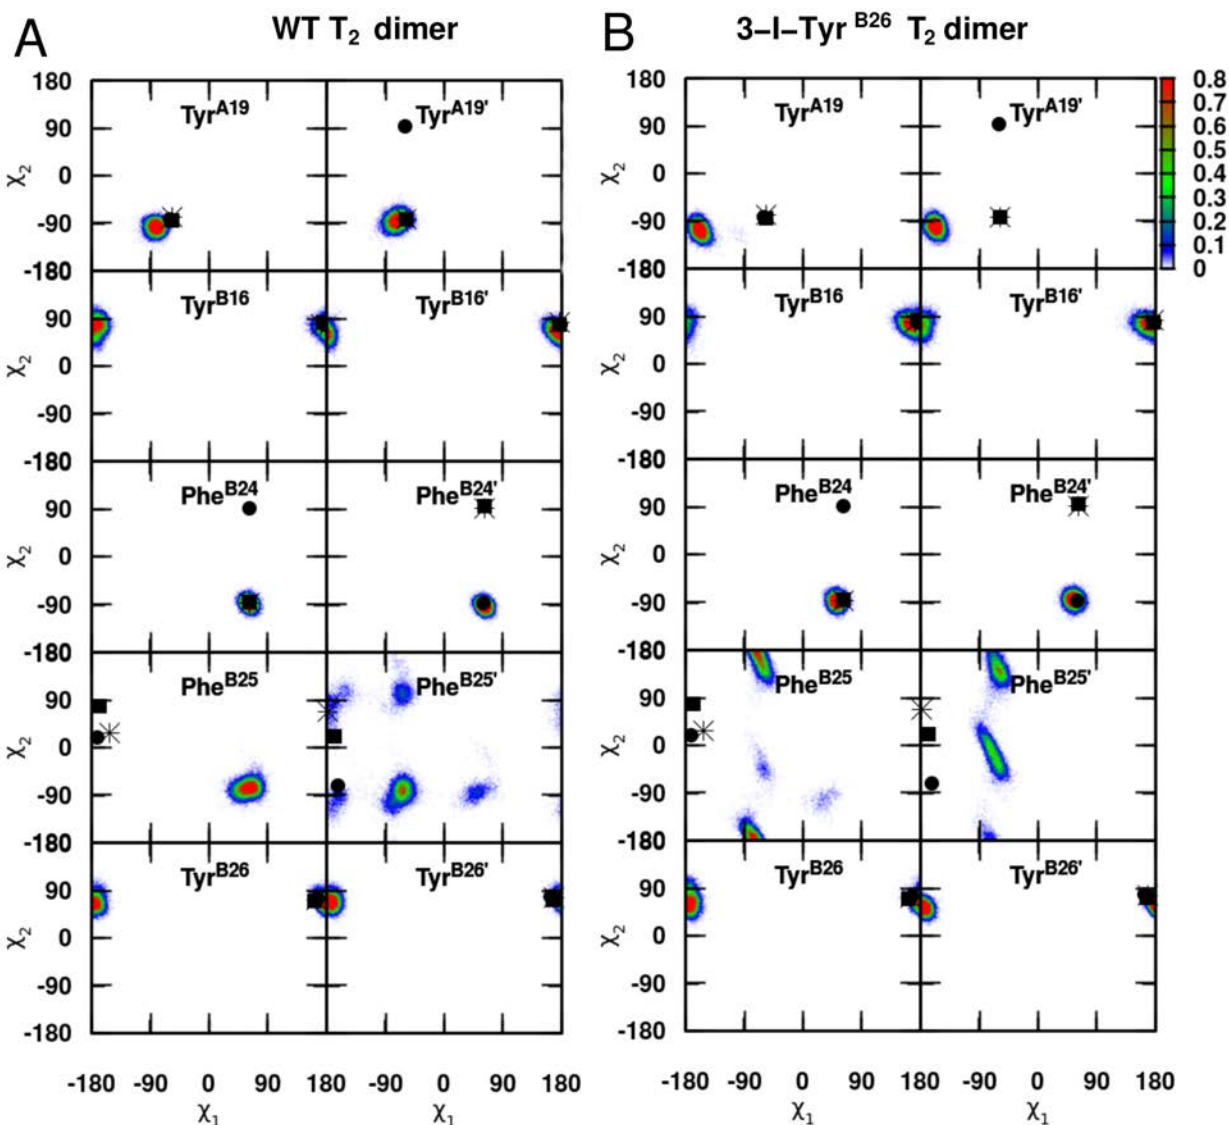

FIGURE S2. **Dihedral probability distribution functions for the  $T_2$  dimers.** Probability distribution functions  $P(\chi_1, \chi_2)$  for Tyr<sup>A19</sup>, Tyr<sup>B16</sup>, Phe<sup>B24</sup>, Phe<sup>B25</sup>, Tyr<sup>B26</sup> and their dimer-related mates (indicated by *primes*) for (A) the WT  $T_2$  dimer, and (B) the 3-iodo-Tyr<sup>B26</sup>  $T_2$  dimer. The distributions were built from 20 ns of equilibrium MD simulations. The starting dimer structure was taken from the  $T_2$  zinc-free dimer WT-insulin structure (PDB code 1DPH). Symbols (*box*, *star*, and *circle*) indicate positions in the X-ray crystal structure of the 3-I-Tyr<sup>B26</sup>-Nle<sup>B29</sup>-insulin hexamer. The side chain of Phe<sup>B25</sup> is disordered; see main text.

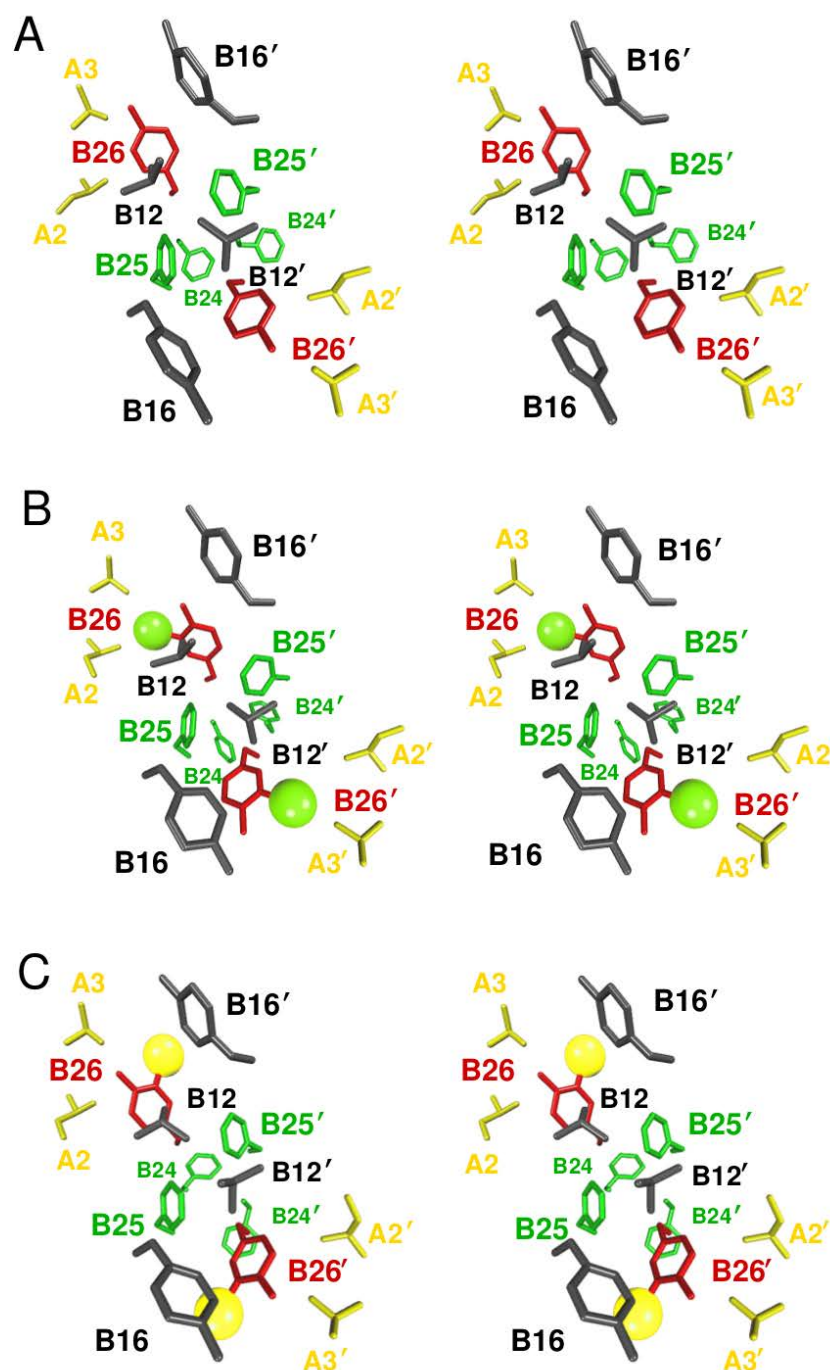

FIGURE S3. **Packing prediction at the dimer interface.** Stereo view of the predicted conformational maps of B-chain aromatic residues from 20 ns MD simulation: (A) Packing in the WT-, (B) 3-I-Tyr<sup>B26</sup>- and (C) 5-I-Tyr<sup>B26</sup>-insulin dimers. Residues Ile<sup>A2</sup>, Val<sup>A3</sup>, Val<sup>B12</sup>, Tyr<sup>B16</sup>, Phe<sup>B24</sup>, Phe<sup>B25</sup>, and Tyr<sup>B26</sup> are shown explicitly (in *licorice*) together with their dimer-related mates. Note the displacement of Val<sup>B12</sup> in (C) due to 5-I-Tyr<sup>B26</sup>, compared to WT- and 3-I-Tyr<sup>B26</sup> dimers (see main text). The starting dimer structures were taken from the T<sub>2</sub> zinc-free dimer WT-insulin structure (PDB code 1DPH). The iodine atoms are shown as *green* and *yellow* spheres for 3-I-Tyr<sup>B26</sup>- and (C) 5-I-Tyr<sup>B26</sup>-insulin dimers, respectively. For an overall view, see also Figure S4.

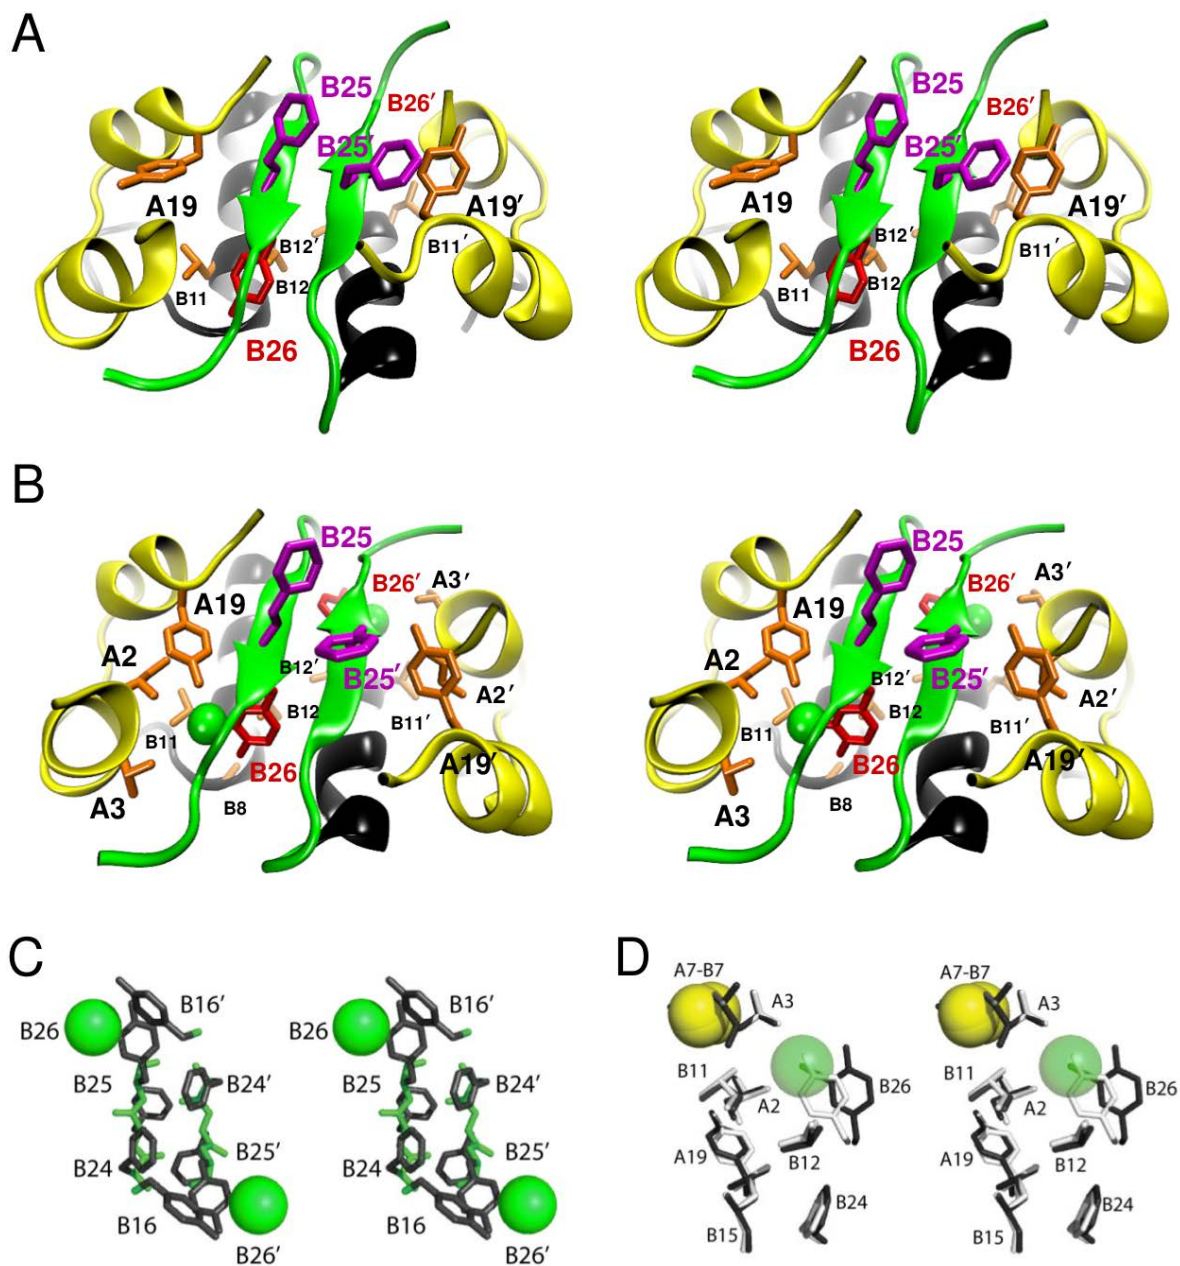

FIGURE S4. Packing at the dimer interface of 3-I-Tyr<sup>B26</sup> insulin analog: predicted (A,B) vs. crystal structure (C, D). (A) WT dimer: Residues Val<sup>B12</sup>, Tyr<sup>A19</sup>, Phe<sup>B25</sup>, and Tyr<sup>B26</sup> are shown (in *licorice*) together with dimer-related mates. (B) 3-I-Tyr<sup>B26</sup> dimer: Local interactions with residue Ile<sup>A2</sup>, Val<sup>A3</sup>, Gly<sup>B8</sup>, Leu<sup>B11</sup>, Val<sup>B12</sup>, and Tyr<sup>A19</sup> are explicitly shown. Iodine atoms are shown as *green* spheres. For a simplified view, see also Figure S3. (C) Stereo view of aromatic-rich dimer interface. The side chains of Tyr<sup>B16</sup>, Phe<sup>B24</sup>, Phe<sup>B25</sup> and 3-I-Tyr<sup>B26</sup> (*dark gray* sticks) are shown in relation to their dimer-related partners and a portion of the anti-parallel  $\beta$ -sheet (*green*; main chain of residues B24-B26 and B24'-B26'). (D) Expanded view of corresponding WT and variant B26 side-chain environments in relation to an inter-chain crevice containing Ile<sup>A2</sup>, Val<sup>A3</sup> and Val<sup>B12</sup>. Neighboring side chains are as labeled; the sulfur atoms of cysteine A7-B7 are shown as *yellow* spheres (van der Waals radii). WT coordinates for panels C and D were obtained from PDB entry 1ZNJ.

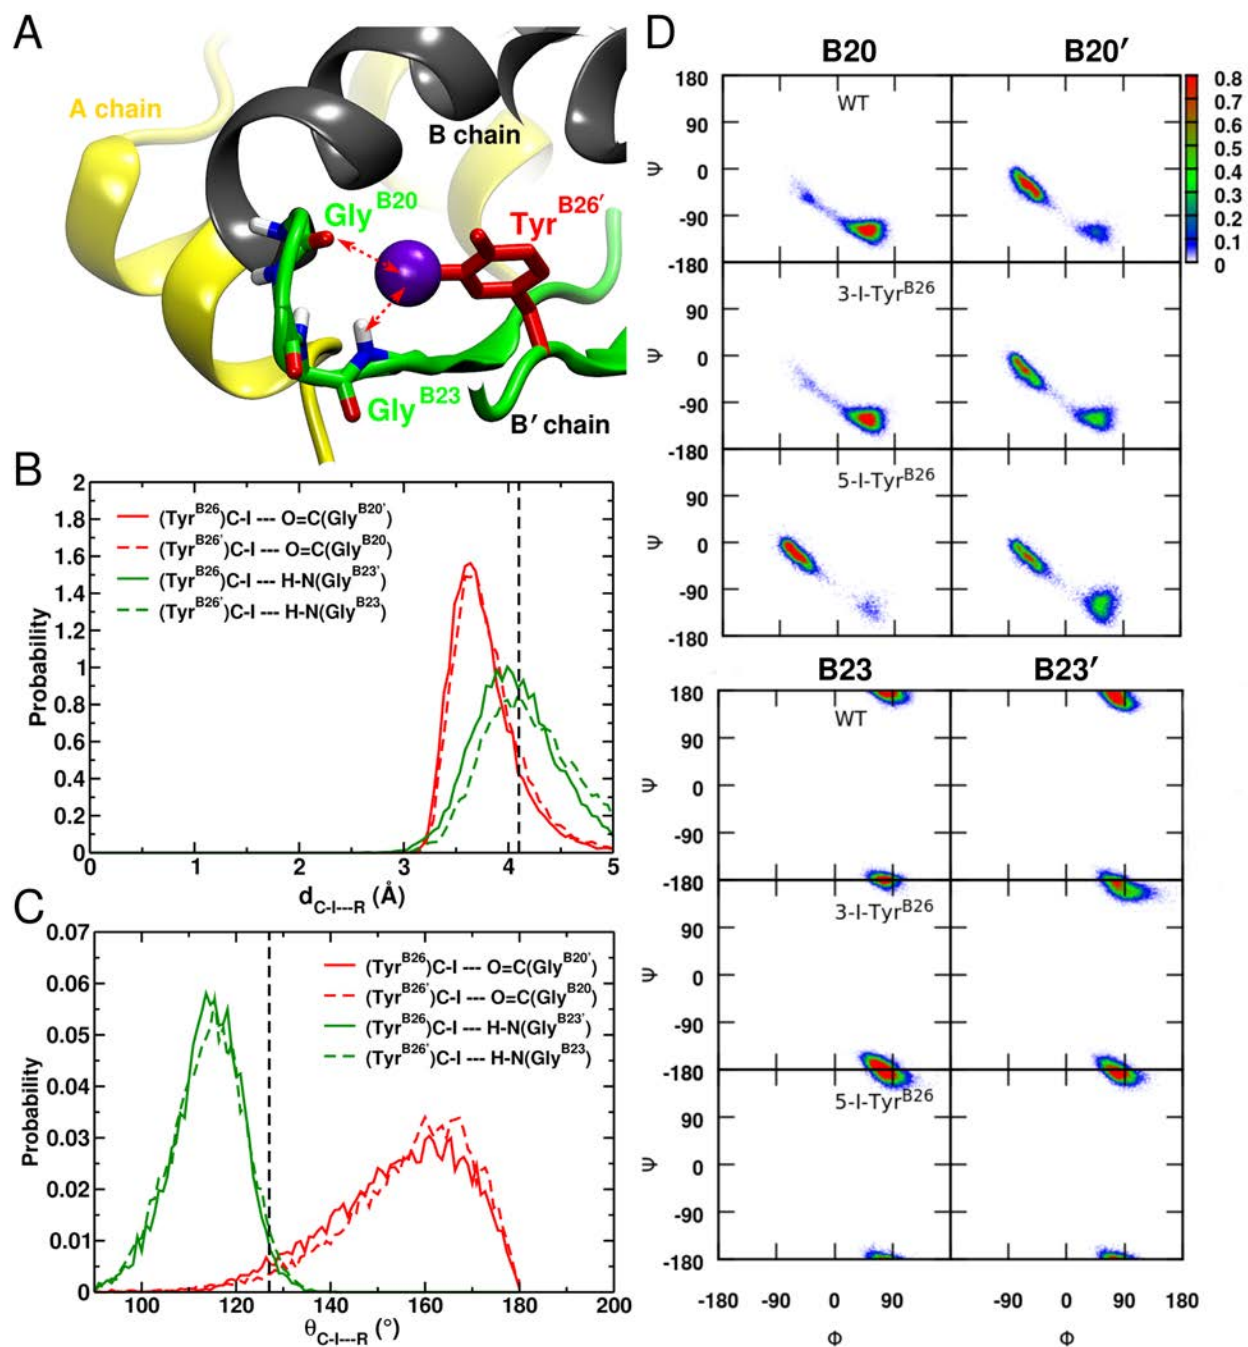

FIGURE S5. **5-I-Tyr<sup>B26</sup>-insulin dimerization interface.** (A) Structure of 5-I-Tyr<sup>B26'</sup>-insulin monomer packing against its related partner illustrates local interaction network between iodine on Tyr<sup>B26'</sup> and the backbone oxygen of Gly<sup>B20</sup> and the backbone NH of Gly<sup>B23</sup>. The iodine atom is shown as a *purple* sphere. Only residues interacting with 5-I-Tyr<sup>B26'</sup> are illustrated. Potential hydrogen/halogen bonds with I are shown as *dashed red lines*. (B) Distance probability distribution of I(Tyr<sup>B26</sup>)—O(Gly<sup>B20'</sup>) (*solid red*), I(Tyr<sup>B26</sup>)—O(Gly<sup>B20</sup>) (*dashed red*), I(Tyr<sup>B26</sup>)—HN(Gly<sup>B23'</sup>) (*solid green*), and I(Tyr<sup>B26</sup>)—HN(Gly<sup>B23</sup>) (*dashed green*) from 20 ns of MD simulation. The *black dashed line* at 4.1 Å represents the I—O distance interaction limit. (C) Angle probability distribution of C-I(Tyr<sup>B26</sup>)—O(Gly<sup>B20'</sup>) (*solid red*), C-I(Tyr<sup>B26</sup>)—O(Gly<sup>B20</sup>) (*dashed red*), C-I(Tyr<sup>B26</sup>)—HN(Gly<sup>B23'</sup>) (*solid green*), and C-I(Tyr<sup>B26</sup>)—HN(Gly<sup>B23</sup>) (*dashed green*) from 20 ns MD simulation. The *black dashed line* at 127° represents the angular limit for I between negative electrostatic region ( $\delta^- < 127^\circ$ ) and positive electrostatic region ( $127^\circ < \delta^+ <$

233°). (D) Predicted backbone dihedral angle distributions ( $\phi$ ,  $\psi$ ) of Gly<sup>B20</sup> (*upper* panels) and Gly<sup>B23</sup> (*lower* panels) in the B20-B23  $\beta$ -turn in WT, 3-I-Tyr<sup>B26</sup> and 5-I-Tyr<sup>B26</sup> insulin dimer from 20 ns of MD simulation, and compared to their dimer-related partners (indicated by primes). The starting dimer structure was taken from the T<sub>2</sub> Zinc-free dimer WT-insulin structure (PDB code 1DPH). 5-I-Tyr<sup>B26</sup> dimer exhibit increased interaction energy along the dimerization interface, compared to WT and 3-I-Tyr<sup>B26</sup>, but note that the way iodine interacts with the backbone O(Gly<sup>B20</sup>) leads to its accommodation in a region in the Ramachandran plot that is in principle permitted for glycine but which is empirically unfavorable in the context of the native conformation of insulin (Nakagawa, S. Hua, Q.-X., Jia, W., Wang, S., Katsoyannis, P.G. and Weiss, M.A. (2006) Chiral Mutagenesis of Insulin. CONTRIBUTION OF THE B20-B23  $\beta$ -TURN TO ACTIVITY AND STABILITY. *J. Biol. Chem.* **281**, 22386-96).

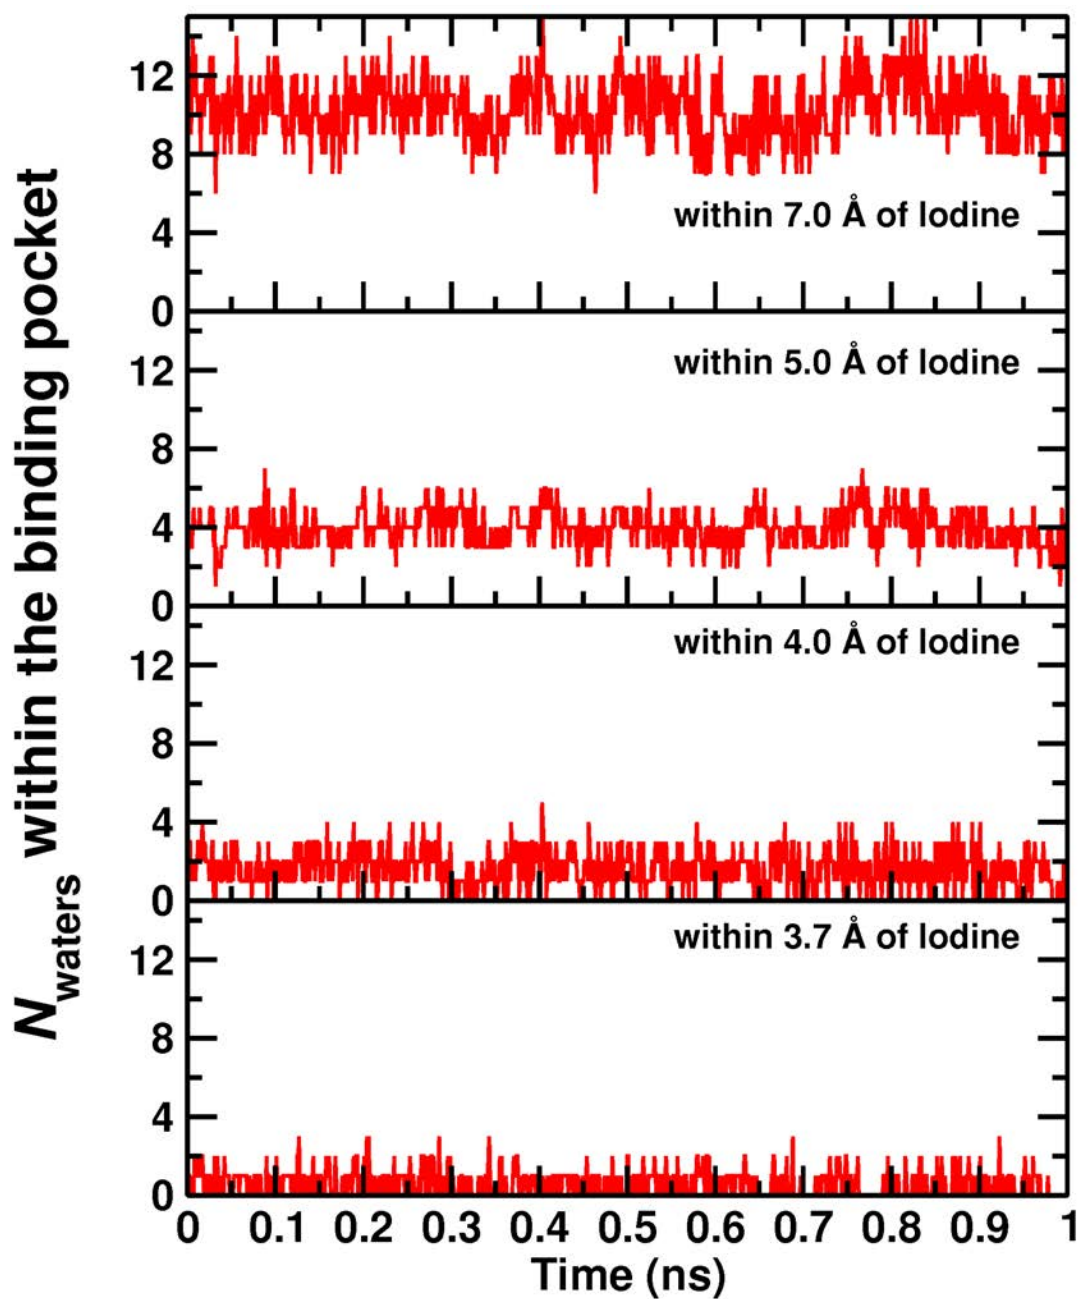

FIGURE S6. **Population of water molecules at the 3-I-Tyr<sup>B26</sup>/μIR interface.** The number  $N$  of water molecules present in a 3.7, 4.0, 5.0 and 7.0 Å spheres centered around the iodine atom within the 3-I-Tyr<sup>B26</sup>/μIR binding pocket during the 1 ns MD simulations.

**Table S1.** Iodo-Tyr<sup>B26</sup>–induced interaction energies contributing to the dimerization. Interaction energies  $E_{total}$  (sum of van der Waals,  $E_{vdW}$ , and electrostatic,  $E_{elec}$ , terms) between Tyr<sup>B26</sup> and neighboring residues calculated for both PC (A) and MTP (B) electrostatics.

**(A)**

| $E_{inter}$<br>(kcal/mol) | 3-I-Tyr <sup>B26</sup> |            |             | 5-I-Tyr <sup>B26</sup> |            |             |
|---------------------------|------------------------|------------|-------------|------------------------|------------|-------------|
|                           | $E_{vdW}$              | $E_{elec}$ | $E_{total}$ | $E_{vdW}$              | $E_{elec}$ | $E_{total}$ |
| Ile <sup>A2</sup>         | -1.25                  | -0.06      | -1.31       | -0.87                  | -0.02      | -0.90       |
| Leu <sup>A3</sup>         | -0.89                  | -0.18      | -1.07       | -0.46                  | -0.18      | -0.65       |
| Gly <sup>B8</sup>         | -1.52                  | -0.41      | -1.93       | -0.98                  | 0.06       | -0.92       |
| Leu <sup>B11</sup>        | -0.94                  | -0.49      | -1.42       | -1.13                  | -0.47      | -1.60       |
| Val <sup>B12</sup>        | -2.45                  | -0.36      | -2.81       | -2.38                  | -0.37      | -2.75       |
| Leu <sup>B15</sup>        | -0.85                  | 0.02       | -0.83       | -0.91                  | 0.02       | -0.89       |
| Pro <sup>B28</sup>        | -3.53                  | -0.09      | -3.63       | -3.23                  | -0.09      | -3.32       |
| Tyr <sup>B16'</sup>       | -2.34                  | -0.89      | -3.23       | -2.60                  | -0.32      | -2.92       |
| Gly <sup>B20'</sup>       | -0.74                  | -1.77      | -2.51       | -0.33                  | -0.04      | -0.38       |
| Gly <sup>B23'</sup>       | -1.06                  | 0.84       | -0.22       | -1.39                  | 0.31       | -1.08       |
| Phe <sup>B24'</sup>       | -2.62                  | -0.68      | -3.30       | -3.47                  | -0.64      | -4.11       |
| Total                     | -18.19                 | -4.06      | -22.25      | -17.75                 | -1.75      | -19.50      |

**(B)**

| $E_{inter}$<br>(kcal/mol) | 3-I-Tyr <sup>B26</sup> |            |             | 5-I-Tyr <sup>B26</sup> |            |             |
|---------------------------|------------------------|------------|-------------|------------------------|------------|-------------|
|                           | $E_{vdW}$              | $E_{elec}$ | $E_{total}$ | $E_{vdW}$              | $E_{elec}$ | $E_{total}$ |
| Ile <sup>A2</sup>         | -0.95                  | -0.47      | -1.41       | -0.54                  | -0.39      | -0.94       |
| Leu <sup>A3</sup>         | -0.84                  | -0.34      | -1.17       | -0.29                  | -0.30      | -0.59       |
| Gly <sup>B8</sup>         | -1.31                  | 0.57       | -0.73       | -0.54                  | -0.01      | -0.55       |
| Leu <sup>B11</sup>        | -0.94                  | -0.63      | -1.58       | -0.66                  | -0.46      | -1.12       |
| Val <sup>B12</sup>        | -2.39                  | -0.91      | -3.30       | -2.04                  | -0.83      | -2.87       |
| Leu <sup>B15</sup>        | -0.78                  | -0.41      | -1.19       | -0.74                  | -0.38      | -1.12       |
| Pro <sup>B28</sup>        | -3.10                  | -0.89      | -3.99       | -2.24                  | -0.78      | -3.02       |
| Tyr <sup>B16'</sup>       | -2.52                  | -1.39      | -3.91       | 0.28                   | -1.96      | -1.68       |
| Gly <sup>B20'</sup>       | -0.60                  | -0.92      | -1.52       | -0.74                  | -1.73      | -2.47       |
| Gly <sup>B23'</sup>       | -0.96                  | -0.60      | -1.56       | -0.73                  | -2.16      | -2.89       |
| Phe <sup>B24'</sup>       | -2.95                  | -0.02      | -2.97       | -2.15                  | -0.14      | -2.29       |
| Total                     | -17.32                 | -6.01      | -23.33      | -10.39                 | -9.14      | -19.53      |
